# Supplementary material
Source: PubMed Central journal article supplement (PMC7062217)
Supplement: ASN.2019060582SupplementaryData.pdf [file ASN.2019060582SupplementaryData.pdf]

## Table of Contents

**Supplemental Figure 1.** Enarodustat did not reduce glomerular hypertrophy or mesangial expansion.

**Supplemental Figure 2.** Enarodustat tended to decrease macrophage infiltration in the tubulointerstitium, but *Ccl2/Mcp1* mRNA expression in the kidney cortex was unchanged.

**Supplemental Figure 3.** Glomerular expression of MMP-10 was suppressed in enarodustat-treated BTBR *ob/ob* mice, but its expression in cultured mesangial cells was not affected by enarodustat or AdipoRon.

**Supplemental Figure 4.** Enarodustat did not change the expression levels of metabolism-related genes or M1/M2 macrophage markers in white adipose tissue.

**Supplemental Figure 5.** The urinary glucose levels did not differ significantly between vehicle-only and enarodustat-treated groups.

**Supplemental Table 1.** Hematocrit and intake of BTBR *ob/ob* mice treated with different doses of enarodustat.

**Supplemental Table 2.** List of primers used in this study.

**A**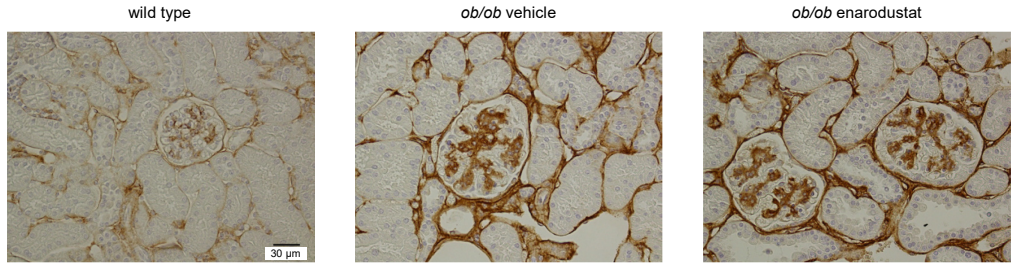**B**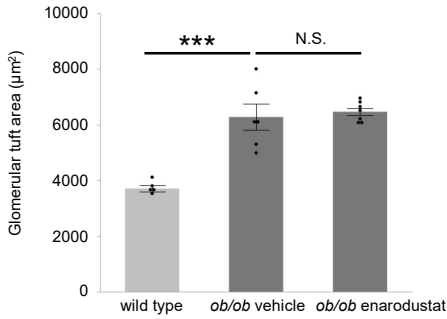**C**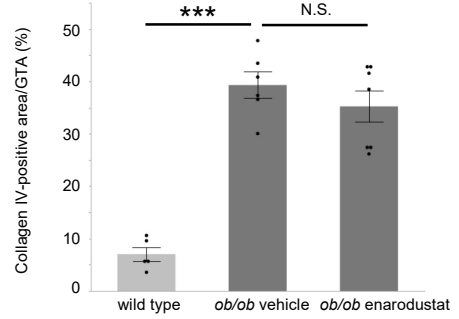

**Supplemental Figure 1.** Enarodustat did not reduce glomerular hypertrophy or mesangial expansion. (A) Representative images of collagen IV staining of kidney. (B) Glomerular tuft area (GTA) was measured in 10 glomeruli per mouse. (C) The percentage of collagen IV-positive area within each glomerulus was measured as the index of mesangial expansion. Ten randomly chosen glomeruli were evaluated per mouse. Data are expressed as means  $\pm$  SEM; wild type, n = 5; ob/ob vehicle, n = 6; ob/ob enarodustat, n = 7. \*\*\* $p$  < 0.001, N.S. not significant.

**A**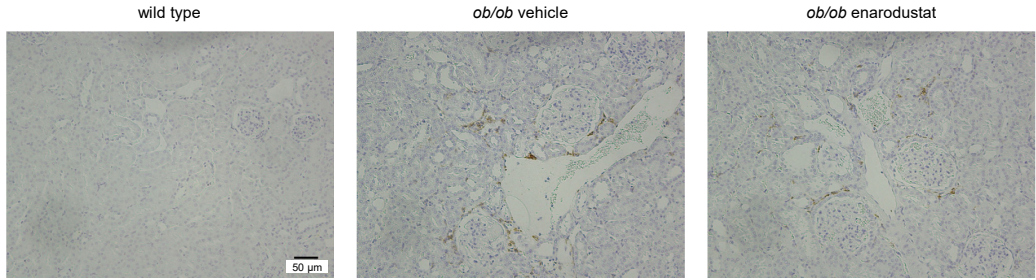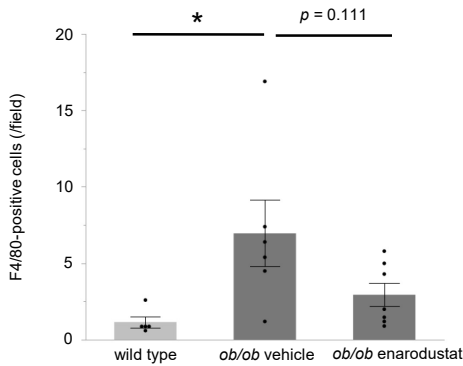**B**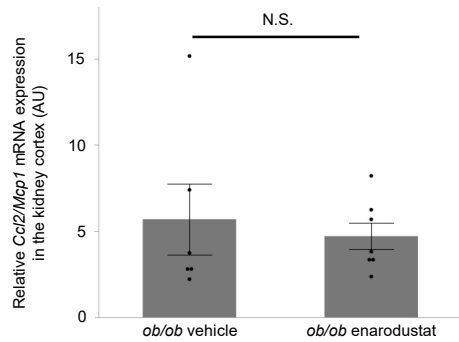

**Supplemental Figure 2.** Enarodustat tended to decrease macrophage infiltration in the tubulointerstitium, but *Ccl2/Mcp1* mRNA expression in the kidney cortex was unchanged. (A) Representative images of F4/80 staining of kidney. The numbers of F4/80-positive cells were evaluated in 10 randomly chosen fields per mouse. (B) The mRNA expression levels of *Ccl2/Mcp1* in the kidney cortex, shown as means relative to wild type after normalization to *Actb* ( $\beta$ -actin). *Ccl2*, C-C motif chemokine ligand 2; *Mcp1*, monocyte chemoattractant protein-1. Data are expressed as means  $\pm$  SEM; wild type, n = 5; *ob/ob* vehicle, n = 6; *ob/ob* enarodustat, n = 7. \* $p$  < 0.05, N.S. not significant.

A

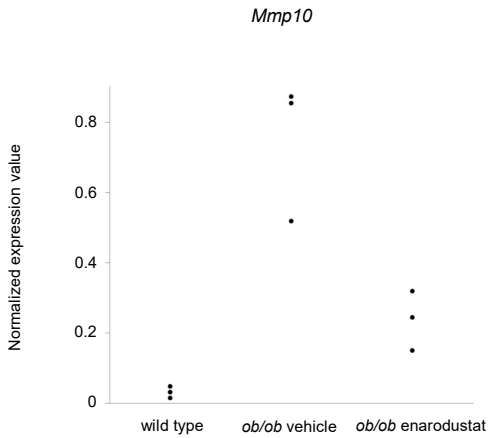

B

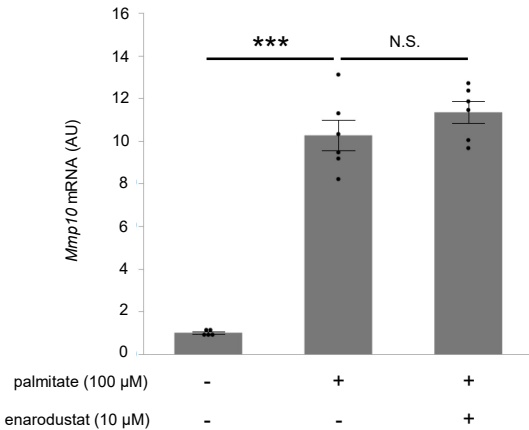

C

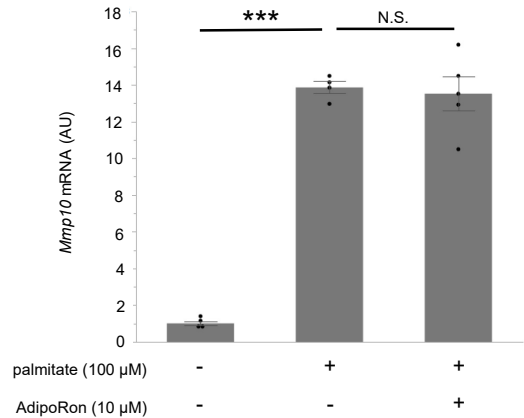

**Supplemental Figure 3.** Glomerular expression of MMP-10 was suppressed in enarodustat-treated BTBR *ob/ob* mice, but its expression in cultured mesangial cells were not affected by enarodustat or AdipoRon (a small molecule adiponectin receptor agonist). (A) Normalized expression values of *Mmp10* in the glomeruli of BTBR wild type and BTBR *ob/ob* mice treated with either vehicle-only or enarodustat. The expression levels were obtained from the transcriptome analysis ( $n = 3$  for each group). (B) Quantitative real-time PCR was performed to assess mRNA expression levels of *Mmp10* in murine mesangial cells after 12-hour stimulation by palmitate, with or without enarodustat ( $n = 5-6$  for each group). (C) The mRNA expression levels of *Mmp10* in murine mesangial cells after 12-hour stimulation by palmitate, with or without AdipoRon ( $n = 4-5$  for each group). The mRNA expression levels are shown as means relative to the control after normalization to *Actb* ( $\beta$ -actin). \*\*\* $p < 0.001$ , N.S. not significant.

**A** Metabolism-related genes

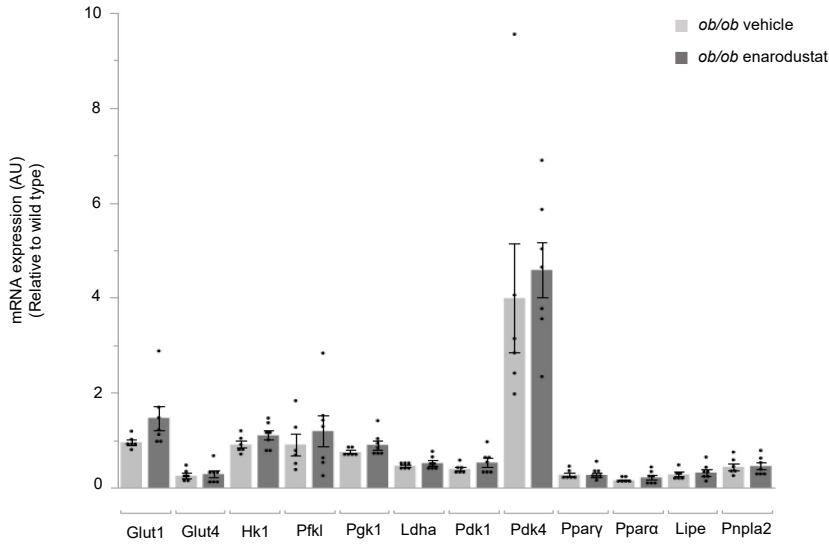

**B** M1 markers

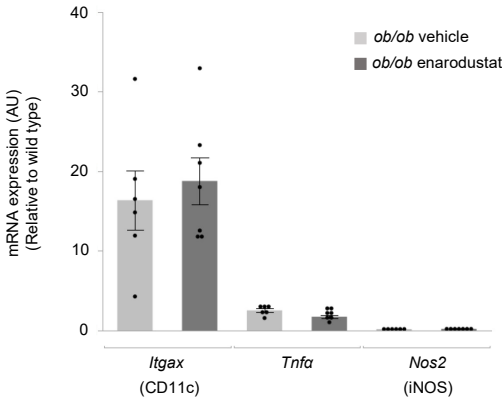

**C** M2 markers

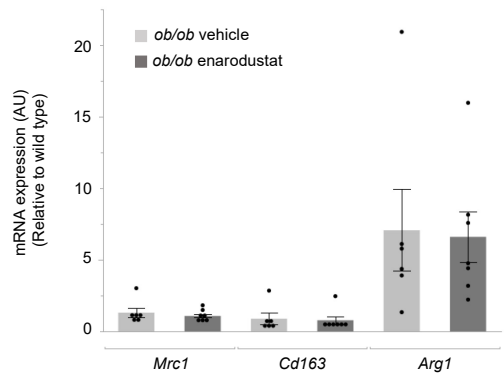

**Supplemental Figure 4.** Enarodustat did not change the expression levels of metabolism-related genes or M1/M2 macrophage markers in white adipose tissue. Quantitative real-time PCR was performed to analyze mRNA levels of metabolism-related genes (A), M1 macrophage markers (B), and M2 macrophage markers (C) in WAT. *Glut1*, glucose transporter type 1; *Glut4*, glucose transporter type 4; *Hk1*, hexokinase-1; *Pfk1*, phosphofruktokinase; *Pgk1*, phosphoglycerate kinase-1; *Ldha*, lactate dehydrogenase; *Pdk1*, pyruvate dehydrogenase kinase 1; *Pdk4*, pyruvate dehydrogenase kinase 4; *Pparγ* and *Pparaα*, peroxisome proliferator-activated receptors  $\gamma$  and  $\alpha$ ; *Lipe*, hormone-sensitive lipase; *Pnpla2*, patatin-like phospholipase domain-containing protein 2; *Itgax*, integrin alpha X; *Tnfa*, tissue necrosis factor- $\alpha$ ; *Nos2*, nitric oxide synthase 2; *Mrc2*, mannose receptor c-type 1; *Arg1*, Arginase 1. The mRNA expression levels are shown as means relative to wild type mice after normalization to *Actb* ( $\beta$ -actin)  $\pm$  SEM; wild type, n = 5; *ob/ob* vehicle, n = 6; *ob/ob* enarodustat, n = 7.

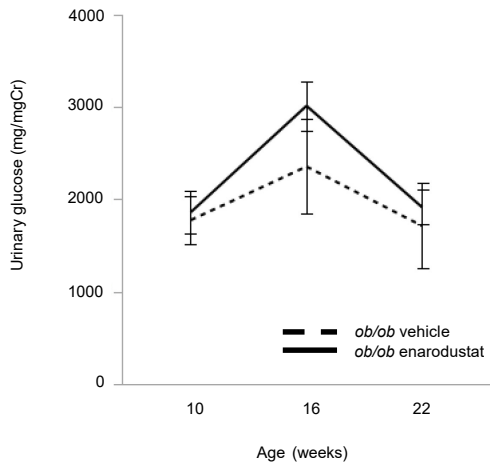

**Supplemental Figure 5.** The urinary glucose levels did not differ significantly between vehicle-only and enarodustat-treated groups. Urinary glucose of BTBR *ob/ob* mice treated with either vehicle-only or enarodustat at 10, 16, and 22 weeks of age. Data are expressed as means  $\pm$  SEM; *ob/ob* vehicle, n = 6; *ob/ob* enarodustat, n = 7.

Supplemental Table 1. Hematocrit and intake of BTBR *ob/ob* mice treated with different doses of enarodustat.

|            | Hematocrit (%) | Intake (g/day) |
|------------|----------------|----------------|
| vehicle    | 46.8 ± 0.9     | 10.9 ± 0.2     |
| 0.015 mg/g | 45.4 ± 0.4     | -              |
| 0.05 mg/g  | 49.5 ± 0.7*    | 10.6 ± 0.1     |
| 0.15 mg/g  | 65.3 ± 1.4***  | 8.2 ± 0.1***   |

Data are expressed as means ± SEM. Hematocrit was measured at 22 weeks of age. Intake was measured at 20 weeks of age. \* $p < 0.05$ , \*\*\* $p < 0.001$  compared to the vehicle-only group.

Supplemental Table 2. List of primers used in this study.

| Gene             | F/R     | Sequence (5'→3')         |
|------------------|---------|--------------------------|
| <i>Actb</i>      | Forward | AAGATCAAGATCATTGCTCCTCT  |
|                  | Reverse | AAACGCAGCTCAGTAACAGTCC   |
| <i>Arg1</i>      | Forward | TTTTTCCAGCAGACCAGCTT     |
|                  | Reverse | GGAACCCAGAGAGAGCATGA     |
| <i>Ccl2/Mcp1</i> | Forward | CAGCTCTCTTCTCCTCCACCAC   |
|                  | Reverse | GCGTAACTGCATCTGGCTGAG    |
| <i>Cd163</i>     | Forward | TCTCCTGGTTGTAAAAGGTTTGT  |
|                  | Reverse | TCATTCATGCTCCAGCCGTT     |
| <i>Glut1</i>     | Forward | GTGACGATCTGAGCTACGGG     |
|                  | Reverse | ACTCCTCAATAACCTTCTGGGG   |
| <i>Glut4</i>     | Forward | CTTATTGCAGCGCCTGAGTC     |
|                  | Reverse | GGGGTTCCCCATCGTCAG       |
| <i>Hk1</i>       | Forward | CTGCTCACCAGGGCTACTG      |
|                  | Reverse | CCCTTTTCTGAGCCGTCGG      |
| <i>Hif-1α</i>    | Forward | GTTTACTAAAGGACAAGTCACC   |
|                  | Reverse | TTCTGTTTGTGAAGGGAG       |
| <i>Hif-2α</i>    | Forward | GTCACCAGAACTTGTGC        |
|                  | Reverse | CAAAGATGCTGTTTCATGG      |
| <i>Il1β</i>      | Forward | ACTGTGAAATGCCACCTTTTG    |
|                  | Reverse | TGTTGATGTGCTGCTGTGAG     |
| <i>Il10</i>      | Forward | GGCGCTGTCATCGATTTCTC     |
|                  | Reverse | ATGGCCTTGTAGACACCTTGG    |
| <i>Il6</i>       | Forward | ACAAAGCCAGAGTCTTCAGAGAG  |
|                  | Reverse | TTGGATGGTCTTGGTCCTTAGCCA |
| <i>Itgax</i>     | Forward | GCTGTTGGCTTGTGGTCCTA     |
|                  | Reverse | AACTGCATCAGGGAGAACCG     |
| <i>Lipe</i>      | Forward | CAGAAGGCACTAGGCCTGATG    |
|                  | Reverse | GGGCTTGCGTCCACTTAGTTC    |
| <i>Ldha</i>      | Forward | GGATGAGCTTGCCCTTGTGA     |
|                  | Reverse | GACCAGCTTGGAGTTCGCACTTA  |
| <i>Mmp10</i>     | Forward | ACTGGAGATTTGATGAGACAAGAC |
|                  | Reverse | GTCCTGGCATTGGGGTCAAA     |
| <i>Mrc1</i>      | Forward | TGGATGGATGGGAGCAAAGT     |
|                  | Reverse | AATGCCAACCTTCCTTGCAG     |
| <i>Nos2</i>      | Forward | CACCTTGGAGTTCACCCAGT     |
|                  | Reverse | ACCACTCGTACTTGGGATGC     |
| <i>Pdk1</i>      | Forward | GCTACGGGACAGATGCGGTTA    |
|                  | Reverse | CAGGCGGCTTTATTGTACACAGG  |
| <i>Pdk4</i>      | Forward | AGCTGCTGGACTTTGGTTCA     |
|                  | Reverse | TGCCTTGAGCCATTGTAGGG     |
| <i>Pfkl</i>      | Forward | CAAACCGGGTACACAGGCAG     |
|                  | Reverse | AGCATTACATCCTTGCGCATC    |
| <i>Pgk1</i>      | Forward | GGAGCGGGTCGTGATGA        |
|                  | Reverse | GCCTTGATCCTTTGGTTGTTG    |
| <i>Pnpla2</i>    | Forward | CAACGCCACTCACATCTACGG    |
|                  | Reverse | GGACACCTCAATAATGTTGGCAC  |
| <i>Ppara</i>     | Forward | CTGCAGAGCAACCATCCAGAT    |
|                  | Reverse | GCCGAAGGTCCACCATTTT      |
| <i>Pparγ</i>     | Forward | GCCCACCAACTTCGGAATC      |
|                  | Reverse | TGCGAGTGGTCTTCCATCAC     |
| <i>Tgfβ</i>      | Forward | GGACTCTCCACCTGCAAGAC     |
|                  | Reverse | CATAGATGGCGTTGTTGCGG     |
| <i>Tnfa</i>      | Forward | ACGTCGTAGCAAACCACCAA     |
|                  | Reverse | ACAAGGTACAACCCATCGGC     |
